# Supplementary material for: Nannoniite, Al2(OH)5F, a new mineral from the Cetine di Cotorniano mine (Tuscany, Italy)
Source: Copernicus journal article supplement (doi:10.5194/ejm-36-1011-2024), 2024-12-11
Supplement: Supplementary file 2 [file ejm-36-1011-2024-supplement.zip]

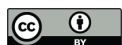

*Supplement of*

**Nannoniite,  $\text{Al}_2(\text{OH})_5\text{F}$ , a new mineral from the Cetine di Cotorniano mine (Tuscany, Italy)**

**Cristian Biagioni et al.**

*Correspondence to:* Cristian Biagioni ([cristian.biagioni@unipi.it](mailto:cristian.biagioni@unipi.it))

- [ejm-36-1011-2024-supplement-title-page.pdf](#)
- [2024-010\\_NANNONIITE\\_ALett.pdf](#)
- [2024-010\\_NANNONIITE\\_CheckCIF.pdf](#)
- [nannoniite.cif](#)

The copyright of individual parts of the supplement might differ from the article licence.
